# Supplementary material
Source: MDPI journal article supplement (https://www.mdpi.com/2410-3888/8/7/365)
Supplement: s1 [file s1]

**Table S1.** Locus-by-locus genetic diversity metrics for Clinch Dace populations. Data for monomorphic loci not shown.  $N$  = number of samples,  $H_o$  = observed heterozygosity,  $H_e$  = expected heterozygosity,  $A$  = number of alleles, Range = range of allele sizes in base pairs,  $M$ -ratio = ratio of  $A$  to Range with ratios suggestive of a recent bottleneck shown in bold font,  $F_{is}$  = inbreeding coefficient, HW =  $p$ -values associated with departures from Hardy-Weinberg expectations, Bonferroni alpha = Bonferroni-corrected critical  $p$ -value.

| Stream         | Locus          | $N$ | $H_o$ | $H_e$ | $A$ | Range (bp) | $M$ -ratio  | $F_{is}$ | HW    | Bonferroni alpha |
|----------------|----------------|-----|-------|-------|-----|------------|-------------|----------|-------|------------------|
| Big Lick Creek | <i>CtoA247</i> | 106 | 0.018 | 0.019 | 2   | 4          | <b>0.50</b> | -0.005   | 1.000 | 0.01             |
|                | <i>Lco3</i>    | 106 | 0.349 | 0.333 | 4   | 8          | <b>0.50</b> | -0.047   | 0.029 | 0.01             |
|                | <i>LleC90</i>  | 106 | 0.123 | 0.134 | 4   | 8          | <b>0.50</b> | 0.087    | 0.054 | 0.01             |
|                | <i>Rhca20</i>  | 106 | 0.009 | 0.009 | 2   | 4          | <b>0.50</b> | 0.000    | 1.000 | 0.01             |
|                | <i>CypG30</i>  | 106 | 0.698 | 0.733 | 6   | 24         | <b>0.25</b> | 0.048    | 0.003 | 0.01             |
|                | <i>Lsou8</i>   | 106 | 0.547 | 0.477 | 2   | 6          | <b>0.33</b> | -0.149   | 0.154 | 0.01             |
| Greasy Creek   | <i>Lco3</i>    | 6   | 0.333 | 0.318 | 3   | 12         | <b>0.25</b> | -0.053   | 1.000 | 0.012            |
|                | <i>BLI153</i>  | 6   | 0.167 | 0.530 | 2   | 2          | 1.00        | 0.706    | 0.150 | 0.012            |
|                | <i>CypG30</i>  | 6   | 0.500 | 0.742 | 5   | 20         | <b>0.25</b> | 0.348    | 0.742 | 0.012            |
|                | <i>Lsou8</i>   | 6   | 0.666 | 0.485 | 2   | 6          | <b>0.33</b> | -0.429   | 1.000 | 0.012            |
| Hart Creek     | <i>Lco3</i>    | 63  | 0.270 | 0.342 | 4   | 8          | <b>0.50</b> | 0.212    | 0.020 | 0.01             |
|                | <i>LleC90</i>  | 62  | 0.080 | 0.283 | 4   | 10         | <b>0.40</b> | 0.717    | 0.000 | 0.01             |
|                | <i>BLI153</i>  | 63  | 0.222 | 0.223 | 2   | 2          | 1.00        | 0.006    | 1.000 | 0.01             |
|                | <i>CypG30</i>  | 62  | 0.919 | 0.755 | 7   | 28         | <b>0.25</b> | -0.22    | 0.000 | 0.01             |
|                | <i>Lsou8</i>   | 63  | 0.317 | 0.498 | 1   | 6          | <b>0.17</b> | 0.364    | 0.005 | 0.01             |
| Hurricane Fork | <i>CtoA247</i> | 40  | 0.050 | 0.096 | 2   | 4          | <b>0.50</b> | 0.483    | 0.076 | 0.012            |
|                | <i>Lco3</i>    | 40  | 0.450 | 0.380 | 2   | 2          | 1.00        | -0.188   | 0.399 | 0.012            |
|                | <i>CypG30</i>  | 40  | 0.925 | 0.823 | 8   | 32         | <b>0.25</b> | -0.125   | 0.002 | 0.012            |
|                | <i>Lsou8</i>   | 40  | 0.150 | 0.140 | 2   | 6          | <b>0.33</b> | -0.068   | 1.000 | 0.012            |
| Lewis Creek    | <i>BLI153</i>  | 3   | 1.000 | 0.600 | 2   | 4          | <b>0.50</b> | -1.000   | 0.401 | 0.025            |
|                | <i>CypG30</i>  | 3   | 0.000 | 0.533 | 2   | 8          | <b>0.25</b> | 1.000    | 0.200 | 0.025            |
| Middle Creek   | <i>Lco3</i>    | 16  | 0.250 | 0.314 | 2   | 2          | 1.00        | 0.317    | 0.433 | 0.017            |
|                | <i>CypG30</i>  | 16  | 0.625 | 0.774 | 7   | 32         | <b>0.22</b> | 0.779    | 0.468 | 0.017            |
|                | <i>Lsou8</i>   | 16  | 0.187 | 0.175 | 2   | 6          | <b>0.33</b> | 0.175    | 1.000 | 0.017            |

Table 2 (continued)

|            |               |    |         |       |   |    |             |        |        |       |
|------------|---------------|----|---------|-------|---|----|-------------|--------|--------|-------|
| Pine Creek | <i>Lco3</i>   | 32 | 0.28125 | 0.302 | 4 | 12 | <b>0.33</b> | 0.070  | 0.0988 | 0.008 |
|            | <i>LleC90</i> | 31 | 0.35484 | 0.297 | 2 | 2  | 1.00        | -0.200 | 0.5535 | 0.008 |
|            | <i>Rhca20</i> | 32 | 0.25    | 0.222 | 2 | 4  | <b>0.50</b> | -0.127 | 1.0000 | 0.008 |
|            | <i>BLI153</i> | 32 | 0.03125 | 0.031 | 2 | 2  | 1.00        | 0.0000 | 1.0000 | 0.008 |
|            | <i>CypG30</i> | 32 | 0.875   | 0.799 | 6 | 24 | <b>0.25</b> | -0.096 | 0.0024 | 0.008 |
|            | <i>Lsou8</i>  | 32 | 0.03125 | 0.031 | 2 | 6  | <b>0.33</b> | 0.000  | 1.0000 | 0.008 |

---
